# Supplementary material for: Enhancing the efficiency of polypyrrole-dodecylbenzene sulfonic acid in-tube solid-phase microextraction coating for analysis of nitrogen-containing pesticides in water environments
Source: Frontiers journal article supplement (doi:10.3389/fenvs.2024.1350170), 2024-05-20
Supplement: Table_1.docx [file Table_1.docx]

Table S1. The Basic Information of 19 Polar Nitrogen-containing Pesticides

| Name | Chemical formula | Molecular weight/(g mol-1) | Structural formula |
| --- | --- | --- | --- |
| Atrazine | C8H14ClN5 | 215.7 |  |
| Simazine | C7H12ClN5 | 201.7 |  |
| Imidacloprid | C9H10ClN5O2 | 255.7 |  |
| Acetamiprid | C10H11ClN4 | 222.7 |  |
| Metsulfuron-methyl | C14H15N5O6S | 381.4 |  |
| Pyrazosulfuron-ethyl | C14H18N6O7S | 414.4 |  |
| Daimuron | C17H20N2O | 268.4 |  |
| Monolinuron | C9H11ClN2O2 | 214.6 |  |
| Florasulam | C12H8F3N5O3S | 359.3 |  |
| Penoxsulam | C16H14F5N5O5S | 483.4 |  |
| Butachlor | C17H26ClNO2 | 311.9 |  |
| Alachlor | C14H20ClNO2 | 269.8 |  |
| Propamocarb | C9H20N2O2 | 188.3 |  |
| Pirimicarb | C11H18N4O2 | 238.4 |  |
| Diflubenzuron | C14H9ClF2N2O2 | 310.7 |  |
| Hexaflumuron | C16H8Cl2F6N2O3 | 461.1 |  |
| Triadimefon | C14H16ClN3O2 | 293.8 |  |
| Fipronil | C12H4Cl2F6N4OS | 437.2 |  |
| Fomesafen | C15H10ClF3N2O6S | 438.8 |  |
