# Supplementary material for: Enhancing the efficiency of polypyrrole-dodecylbenzene sulfonic acid in-tube solid-phase microextraction coating for analysis of nitrogen-containing pesticides in water environments
Source: Frontiers journal article supplement (doi:10.3389/fenvs.2024.1350170), 2024-05-20
Supplement: Table_2.DOCX [file Table_2.DOCX]

**Table S2. Detailed Mass Spectrometry Parameters for 19 Nitrogen-Containing Pesticides**

| Analyte | Ionization Mode | min - Retention Time (min) | Parent Ion m/z | Daughter Ion m/z | Q1 V | CE V | Q3 V |
| --- | --- | --- | --- | --- | --- | --- | --- |
| Alachlor | ESI+ | 8.52 | 270.1 | 162.1* | -10 | -20 | -16 |
| 147.1 | -10 | -30 | -67 |
| Triadimefon | ESI+ | 7.94 | 294.1 | 69.2* | -21 | -22 | -26 |
| 197.1 | -21 | -15 | -21 |
| Butachlor | ESI+ | 10.77 | 312.2 | 162.2 | -11 | -11 | -15 |
| 238.1* | -11 | -23 | -16 |
| Propamocarb | ESI+ | 2.51 | 189.2 | 102.1* | -30 | -20 | -23 |
| 144.1 | -30 | -12 | -15 |
| Pirimicarb | ESI+ | 3.33 | 239.2 | 72.1 | -30 | -25 | -30 |
| 182.2* | -30 | -19 | -30 |
| Atrazine | ESI+ | 6.21 | 216.0 | 174.1* | -30 | -17 | -18 |
| 96.1 | -30 | -25 | -17 |
| Simazine | ESI+ | 4.36 | 202.1 | 132 | -30 | -19 | -25 |
| 124.1* | -30 | -17 | -23 |
| Imidacloprid | ESI+ | 2.85 | 256.1 | 175.1 | -16 | -16 | -17 |
| 209.1* | -16 | -16 | -20 |
| Acetamiprid | ESI+ | 2.99 | 223.1 | 126.1* | -30 | -22 | -30 |
| 56.1 | -30 | -15 | -23 |
| Metsulfuron-methyl | ESI+ | 4.35 | 382.1 | 167.1* | -19 | -16 | -18 |
| 141 | -19 | -15 | -26 |
| Pyrazosulfuron-ethyl | ESI+ | 8.22 | 415.1 | 182.1* | -21 | -18 | -19 |
| 139.1 | -21 | -42 | -24 |
| Daimuron | ESI+ | 7.87 | 269.2 | 151.1* | -30 | -12 | -16 |
| 91.1 | -30 | -40 | -16 |
| Monolinuron | ESI+ | 5.28 | 215.0 | 126.0* | -11 | -20 | -21 |
| 148.1 | -11 | -15 | -15 |
| Florasulam | ESI+ | 3.31 | 360.1 | 129.1* | -24 | -23 | -23 |
| 109.1 | -24 | -60 | -18 |
| Diflubenzuron | ESI- | 8.86 | 309.1 | 289.1* | 21 | 8 | 18 |
| 156.2 | 21 | 10 | 27 |
| Hexaflumuron | ESI- | 10.55 | 459.0 | 438.9* | 16 | 12 | 29 |
| 175.1 | 16 | 36 | 29 |
| Fipronil | ESI- | 9.05 | 435.0 | 330.0* | 10 | 16 | 21 |
| 250 | 10 | 28 | 24 |
| Fomesafen | ESI- | 7.90 | 437.0 | 195.2* | 30 | 40 | 18 |
| 286.1 | 30 | 24 | 17 |
| Penoxsulam | ESI- | 5.22 | 482.0 | 179.0* | 23 | 26 | 30 |
| 224.1 | 23 | 45 | 21 |

Note: * indicates the quantifier ion.
