# Supplementary material for: Enhancing the efficiency of polypyrrole-dodecylbenzene sulfonic acid in-tube solid-phase microextraction coating for analysis of nitrogen-containing pesticides in water environments
Source: Frontiers journal article supplement (doi:10.3389/fenvs.2024.1350170), 2024-05-20
Supplement: Table_3.DOCX [file Table_3.DOCX]

**Table S3. Linear equations and correlation coefficients of 19 nitrogen-containing pesticide compounds were established by PPy-SDBA/IT-SPME.**

| NO. | Compound | Linear range (mg/L) | Matrix | Linear equation | Correlation coefficient (R2) |
| --- | --- | --- | --- | --- | --- |
| 1 | Alachlor | 0.01-1 | Solvent | y = 4284.1x - 2259.6 | 0.9999 |
| 2 | Triadimefon | 0.01-1 | y = 19145x + 123176 | 0.9997 |
| 3 | Butachlor | 0.01-1 | y = 12878x + 114965 | 0.9996 |
| 4 | Propamocarb | 0.01-1 | y = 36462x + 125594 | 0.9995 |
| 5 | Pirimicarb | 0.01-1 | y = 18945x + 59498 | 0.9999 |
| 6 | Atrazine | 0.01-1 | y = 34833x + 126721 | 0.9999 |
| 7 | Simazine | 0.01-1 | y = 9621.9x + 37972 | 0.9999 |
| 8 | Imidacloprid | 0.01-1 | y = 1271x + 8088.2 | 0.9996 |
| 9 | Acetamiprid | 0.01-1 | y = 1771.3x + 13104 | 0.9998 |
| 10 | Metsulfuron-methyl | 0.01-1 | y = 4424.8x + 10801 | 0.9999 |
| 11 | Pyrazosulfuron-ethyl | 0.01-1 | y = 7883.7x - 17222 | 0.9994 |
| 12 | Daimuron | 0.01-1 | y = 44195x + 223238 | 0.9999 |
| 13 | Monolinuron | 0.01-1 | y = 2854.9x + 13131 | 0.9999 |
| 14 | Florasulam | 0.01-1 | y = 5467.2x + 24433 | 0.9999 |
| 15 | Diflubenzuron | 0.01-1 | y = 640.9x - 2692.2 | 0.9994 |
| 16 | Hexaflumuron | 0.01-1 | y = 1847.5x + 18724 | 0.9997 |
| 17 | Fipronil | 0.01-1 | y = 1281.9x - 2546.9 | 0.9999 |
| 18 | Fomesafen | 0.01-1 | y = 423.27x - 780.86 | 0.9998 |
| 19 | Penoxsulam | 0.01-1 | y = 170.06x - 997.02 | 0.9998 |
