# Supplementary material for: Enhancing the efficiency of polypyrrole-dodecylbenzene sulfonic acid in-tube solid-phase microextraction coating for analysis of nitrogen-containing pesticides in water environments
Source: Frontiers journal article supplement (doi:10.3389/fenvs.2024.1350170), 2024-05-20
Supplement: Table_4.DOCX [file Table_4.DOCX]

**Table S4. Recovery rates of 19 nitrogen-containing pesticide compounds in water (n=5)**

| NO. | Compound | Average recovery rate (%) | | | RSD (%) |
| --- | --- | --- | --- | --- | --- |
| Added concentration (μg/L) | Added concentration (μg/L) | Added concentration (μg/L) |
| 10 | 100 | 500 |
| 1 | Alachlor | 72.87% | 74.88% | 71.65% | 1.2-3.9 |
| 2 | Triadimefon | 71.53% | 72.74% | 75.03% | 1.4-3.8 |
| 3 | Butachlor | 84.27% | 81.67% | 89.15% | 1.9-3.7 |
| 4 | Propamocarb | 61.92% | 65.82% | 68.29% | 1.9-3.5 |
| 5 | Pirimicarb | 79.29% | 72.23% | 73.58% | 2.1-4.5 |
| 6 | Atrazine | 99.59% | 98.87% | 100.77% | 1.5-3.4 |
| 7 | Simazine | 71.85% | 93.09% | 93.63% | 2.0-3.4 |
| 8 | Imidacloprid | 95.67% | 94.35% | 99.55% | 1.6-3.9 |
| 9 | Acetamiprid | 98.84% | 115.21% | 114.50% | 1.5-3.8 |
| 10 | Metsulfuron-methyl | 88.24% | 94.24% | 95.88% | 1.7-3.8 |
| 11 | Pyrazosulfuron-ethyl | 92.17% | 105.34% | 98.67% | 1.4-2.6 |
| 12 | Daimuron | 89.74% | 99.19% | 100.73% | 1.6-2.9 |
| 13 | Monolinuron | 89.93% | 90.49% | 92.45% | 1.4-3.8 |
| 14 | Florasulam | 82.92% | 106.53% | 106.25% | 1.3-3.5 |
| 15 | Diflubenzuron | 82.19% | 87.44% | 93.41% | 2.1-4.7 |
| 16 | Hexaflumuron | 71.12% | 77.66% | 71.76% | 2.0-3.5 |
| 17 | Fipronil | 82.59% | 83.11% | 82.45% | 1.8-3.5 |
| 18 | Fomesafen | 104.20% | 98.42% | 93.56% | 2.4-3.7 |
| 19 | Penoxsulam | 102.02% | 99.01% | 98.28% | 2.6-3.9 |
