# Supplementary material for: Enhancing the efficiency of polypyrrole-dodecylbenzene sulfonic acid in-tube solid-phase microextraction coating for analysis of nitrogen-containing pesticides in water environments
Source: Frontiers journal article supplement (doi:10.3389/fenvs.2024.1350170), 2024-05-20
Supplement: Table_5.docx [file Table_5.docx]

**Table S5. Comparison with other pre-processing methods**

| Pre-processing | Method Sample Volume (mL) | Solvent Volume (mL) | Time Required (min) | Material Preparation Time (min) | References |
| --- | --- | --- | --- | --- | --- |
| Solid phase extraction | 500 | 30 | 150~210 | / | (GUO Xin-Yan, 2015) |
| Solid phase extraction | 500 | 26 | 110~260 | / | (WANG Ya-Na, 2020) |
| Ionic liquid solvent flotation | 6 | 99 | 60 | / | (WANG Liang, 2009) |
| Molecularly imprinted | 75 | 1 | 75 | 80 | (ZENG Guo-Long, 2020) |
| Magnetic solid phase extraction | 100 | 10 | 25 | / | (GUO Ming, 2016) |
| Dispersive liquid-liquid microextraction | 10 | 0.93 | 10 | 30 | (SERESHTI H 2020) |
| PPy-PSS /IT-SPME | 0.1 | 2.3 | 8 | 10 | This method |

**References**

GUO Ming, Y. F., JIA Ke-Ling, LI Jiao, SUN Hai (2016,). *Chin. J. Chromatogr* 34 (04), 407-413.

GUO Xin-Yan, W. N., HAO Li-Jun, ZHI Yong, XU Jing, WANG Jiu-Chang, SHAN Zheng-Jun. (2015). *Chin. J. Anal. Chem.* 43 (01), 13-20.

SERESHTI H , K. F., NOURI N (2020). *Microchem. J* 163 105914.

WANG Liang, Y. y.-S., ZHU Wen-Shuai, LI Hua-Ming (2009). *Chin. J. Anal. Chem.* 37 (01), 72-76.

WANG Ya-Na, P. J., XIE Shuang, RAO Zhu, ZHAN Nan, HUANG Xin-Mei, HUANG He-Tian, GUO Feng, YANG Hong-Bo (2020). *Environ. Chem* 39 (01), 188-196.

ZENG Guo-Long, M. X.-G., FAN Yin-Ming. J. (2020). *INSTRUMENTAL. ANA* 39 (06), 749-755.
